# Supplementary material
Source: PubMed Central journal article supplement (PMC10576532)

**SUPPLEMENTAL DIGITAL APPENDIX**

**Table S1.** Characteristics of patients in the study sample compared to kidney transplant recipients not included in the cohort.

| <b>Baseline Characteristics</b>    | <b>Study Cohort<br/>(N=67,362)</b> | <b>Kidney Transplant<br/>Recipients Not Included<br/>in Cohort<br/>(N=126,622)</b> |
|------------------------------------|------------------------------------|------------------------------------------------------------------------------------|
|                                    | %                                  | %                                                                                  |
| Age, years                         |                                    | ‡                                                                                  |
| 18 to 64                           | 77.9                               | 85.2                                                                               |
| ≥65                                | 22.1                               | 14.9                                                                               |
| Sex                                |                                    | †                                                                                  |
| Male                               | 60.5                               | 61.4                                                                               |
| Female                             | 39.6                               | 38.7                                                                               |
| Race                               |                                    | ‡                                                                                  |
| White                              | 45.8                               | 55.4                                                                               |
| African-American                   | 30.0                               | 22.3                                                                               |
| Hispanic                           | 17.9                               | 14.1                                                                               |
| Other                              | 6.3                                | 8.2                                                                                |
| Employment status                  |                                    | ‡                                                                                  |
| Working                            | 17.7                               | 37.0                                                                               |
| Not working                        | 73.8                               | 53.4                                                                               |
| Missing                            | 8.5                                | 9.6                                                                                |
| Body mass index, kg/m <sup>2</sup> |                                    | ‡                                                                                  |
| <18.5                              | 2.3                                | 2.4                                                                                |
| 18.5 to 24.9                       | 29.6                               | 30.3                                                                               |
| 25.0 to 29.9                       | 32.7                               | 32.7                                                                               |
| ≥30.0                              | 33.7                               | 31.8                                                                               |
| Missing                            | 1.8                                | 2.8                                                                                |
| Comorbid conditions                |                                    |                                                                                    |
| Hypertension                       | 32.5                               | 35.9 ‡                                                                             |
| Diabetes mellitus                  | 36.5                               | 34.0 ‡                                                                             |
| Coronary artery disease            | 4.1                                | 4.1                                                                                |
| Cerebral vascular disease          | 0.7                                | 0.7                                                                                |
| Peripheral vascular disease        | 7.6                                | 5.8 ‡                                                                              |
| COPD                               | 0.5                                | 0.4 ‡                                                                              |
| Hepatitis C positive               | 5.3                                | 5.3                                                                                |
| Cause of ESKD                      |                                    | ‡                                                                                  |
| Hypertension                       | 22.3                               | 17.5                                                                               |
| Diabetes mellitus                  | 30.1                               | 27.2                                                                               |
| Glomerulonephritis                 | 30.4                               | 31.6                                                                               |
| Polycystic kidney disease          | 7.8                                | 11.7                                                                               |
| Other                              | 9.5                                | 12.0                                                                               |

|                              |      |      |
|------------------------------|------|------|
| Duration of dialysis, months |      | ‡    |
| None (pre-emptive)           | 6.0  | 19.7 |
| >0 to 24                     | 17.6 | 31.6 |
| 25 to 60                     | 36.5 | 24.0 |
| >60                          | 39.9 | 24.4 |
| Missing                      | 0.1  | 0.4  |
| Most current PRA level (%)   |      | ‡    |
| <10                          | 68.9 | 71.5 |
| 10 to 79                     | 17.1 | 14.4 |
| ≥80                          | 10.6 | 7.8  |
| Missing                      | 3.5  | 6.3  |
| HLA mismatches               |      | ‡    |
| Zero A, B, DR                | 6.8  | 8.4  |
| Zero DR                      | 10.8 | 10.6 |
| Other                        | 82.4 | 81.0 |
| Cold ischemia time, hours    |      | ‡    |
| ≤12                          | 40.2 | 50.5 |
| 13 to 24                     | 39.1 | 28.7 |
| 25 to 36                     | 12.0 | 9.1  |
| ≥37                          | 3.1  | 2.2  |
| Missing                      | 5.6  | 9.5  |
| Previous organ transplant    |      | ‡    |
| Yes                          | 15.0 | 14.3 |
| No                           | 85.0 | 85.7 |
| Donor Type                   |      | ‡    |
| Living donor                 | 22.8 | 41.4 |
| Deceased, KPDI <20           | 16.1 | 15.4 |
| Deceased, KDPI 20 to 85      | 52.8 | 37.4 |
| Deceased, KDPI >85           | 8.3  | 5.8  |
| Transplant era               |      | ‡    |
| 2005 to 2008                 | 28.1 | 34.7 |
| 2009 to 2012                 | 38.4 | 29.7 |
| 2013 to 2016                 | 33.5 | 35.6 |

P-values: \* p<0.05–0.002; † p=0.001–0.0001; ‡ p<0.0001

Data presented as column percentages (%).

“Other race” includes Asian, Native American, Pacific Islander, and multi-racial.

Abbreviations: ALEM, Alemtuzumab; AZA, azathioprine; COPD, chronic obstructive pulmonary disease; CsA, cyclosporine A; ESKD, end-stage kidney disease; HLA, human leukocyte antigen; IL2, Interleukin-2; KDPI, Kidney donor profile index; MPA, mycophenolic acid; mTORi, Mammalian target of rapamycin inhibitor; No Pred, no prednisone use post-transplant; Pred, prednisone use documented post-transplant; Tac, Tacrolimus; TMG, Thymoglobulin; Triple Therapy, Tac+MPA/AZA+Pred; PRA, panel reactive antibody.

**Table S2A. Distributions of early immunosuppression regimen use among kidney transplant recipients age 18-64 years according to other baseline patient, donor and transplant factors**

|                                          | <b>TMG/ALEM+ Triple Therapy (Reference) (N=24,656)</b> | <b>IL2rAb+Triple Therapy (N=7,705)</b> | <b>TMG/ALEM+ Tac+MPA/AZA, No Pred (N=10,070)</b> | <b>IL2rAb+ Tac+MPA/AZA, No Pred (N=938)</b> | <b>Tac, Tac+Pred (N=1,614)</b> | <b>mTORi-based (N=4,043)</b> | <b>CsA-based (N=3,471)</b> |
|------------------------------------------|--------------------------------------------------------|----------------------------------------|--------------------------------------------------|---------------------------------------------|--------------------------------|------------------------------|----------------------------|
|                                          | <b>%</b>                                               | <b>%</b>                               | <b>%</b>                                         | <b>%</b>                                    | <b>%</b>                       | <b>%</b>                     | <b>%</b>                   |
| <b>Sex</b>                               |                                                        |                                        |                                                  |                                             |                                |                              |                            |
| Male (n=31,591)                          | 44.7                                                   | 15.6                                   | 20.1                                             | 1.8                                         | 3.1                            | 8.1                          | 6.7                        |
| Female (n=20,906)                        | 50.3                                                   | 13.3                                   | 17.9                                             | 1.7                                         | 3.1                            | 7.2                          | 6.6                        |
| <b>Race</b>                              |                                                        |                                        |                                                  |                                             |                                |                              |                            |
| White (n=21,334)                         | 42.3                                                   | 15.7                                   | 20.0                                             | 2.2                                         | 3.6                            | 8.8                          | 7.4                        |
| African American (n=17,488)              | 54.4                                                   | 11.9                                   | 17.6                                             | 1.0                                         | 2.7                            | 7.3                          | 5.1                        |
| Hispanic (n=10,377)                      | 46.0                                                   | 15.8                                   | 20.7                                             | 2.1                                         | 2.4                            | 6.5                          | 6.5                        |
| Other (n=3,298)                          | 41.4                                                   | 18.8                                   | 17.5                                             | 2.3                                         | 3.3                            | 6.6                          | 10.1                       |
| <b>Employment status</b>                 |                                                        |                                        |                                                  |                                             |                                |                              |                            |
| Working (n=10,202)                       | 44.7                                                   | 14.8                                   | 21.5                                             | 2.2                                         | 3.8                            | 7.2                          | 5.7                        |
| Not working (n=37,391)                   | 47.7                                                   | 14.9                                   | 18.5                                             | 1.7                                         | 2.9                            | 8.0                          | 6.4                        |
| <b>Body mass index, kg/m<sup>2</sup></b> |                                                        |                                        |                                                  |                                             |                                |                              |                            |
| <18.5 (n=1,350)                          | 48.3                                                   | 16.2                                   | 13.6                                             | 2.4                                         | 4.0                            | 8.4                          | 7.3                        |
| 18.5 to 24.9 (n=15,939)                  | 47.6                                                   | 15.6                                   | 17.4                                             | 1.9                                         | 3.0                            | 7.8                          | 6.6                        |
| 25.0 to 29.9 (n=16,401)                  | 46.4                                                   | 15.3                                   | 19.0                                             | 1.9                                         | 3.1                            | 8.1                          | 6.2                        |
| ≥30.0 (n=17,875)                         | 47.5                                                   | 13.5                                   | 20.6                                             | 1.6                                         | 2.8                            | 7.2                          | 6.8                        |
| <b>Comorbid conditions</b>               |                                                        |                                        |                                                  |                                             |                                |                              |                            |
| Hypertension (n=16,484)                  | 46.4                                                   | 13.9                                   | 19.4                                             | 1.8                                         | 3.1                            | 8.7                          | 6.9                        |
| Diabetes mellitus (n=17,617)             | 43.5                                                   | 15.5                                   | 20.8                                             | 2.2                                         | 3.2                            | 7.5                          | 7.4                        |
| Coronary artery disease (n=1,907)        | 38.3                                                   | 14.4                                   | 18.8                                             | 3.0                                         | 3.9                            | 11.8                         | 9.8                        |
| Cerebral vascular disease (n=343)        | 36.2                                                   | 13.7                                   | 23.0                                             | 1.2                                         | 2.0                            | 12.0                         | 12.0                       |
| Peripheral vascular disease (n=3,650)    | 45.0                                                   | 16.3                                   | 19.3                                             | 2.1                                         | 2.4                            | 7.2                          | 7.7                        |
| COPD (n=251)                             | 34.3                                                   | 11.6                                   | 19.5                                             | 4.8                                         | 4.0                            | 13.6                         | 12.4                       |
| Hepatitis C positive (n=3,053)           | 45.2                                                   | 17.7                                   | 14.3                                             | 2.7                                         | 3.3                            | 6.6                          | 10.3                       |
| <b>Cause of ESKD</b>                     |                                                        |                                        |                                                  |                                             |                                |                              |                            |
| Hypertension (n=11,445)                  | 49.5                                                   | 13.3                                   | 19.3                                             | 1.2                                         | 2.7                            | 8.1                          | 5.8                        |

|                                     |      |      |      |     |     |      |      |
|-------------------------------------|------|------|------|-----|-----|------|------|
| Diabetes mellitus (n=14,455)        | 43.0 | 15.7 | 21.5 | 2.2 | 3.0 | 7.3  | 7.3  |
| Glomerulonephritis (n=17,609)       | 49.6 | 14.3 | 17.5 | 1.7 | 3.0 | 7.4  | 6.6  |
| Polycystic kidney disease (n=3,909) | 43.9 | 14.0 | 22.0 | 1.6 | 3.5 | 9.0  | 6.0  |
| Other (n=5,079)                     | 46.1 | 16.5 | 16.1 | 2.2 | 4.0 | 7.9  | 7.1  |
| Duration of dialysis, months        |      |      |      |     |     |      |      |
| None (pre-emptive) (n=1,702)        | 29.3 | 19.0 | 23.0 | 4.0 | 6.5 | 8.3  | 9.9  |
| >0 to 24 (n=8,056)                  | 36.3 | 19.3 | 21.0 | 3.0 | 3.8 | 9.0  | 7.7  |
| 25 to 60 (n=19,343)                 | 44.4 | 15.0 | 21.3 | 1.7 | 3.2 | 8.1  | 6.3  |
| >60 (n=23,382)                      | 54.1 | 12.5 | 16.6 | 1.3 | 2.5 | 6.9  | 6.2  |
| Most current PRA level (%)          |      |      |      |     |     |      |      |
| <10 (n=35,288)                      | 40.9 | 17.3 | 21.6 | 2.1 | 3.3 | 7.9  | 7.0  |
| 10 to 79 (n=9,262)                  | 57.0 | 10.6 | 15.6 | 1.1 | 2.9 | 7.2  | 5.7  |
| ≥80 (n=6,143)                       | 71.1 | 5.7  | 10.6 | 0.5 | 2.1 | 5.3  | 4.8  |
| HLA mismatches                      |      |      |      |     |     |      |      |
| Zero A, B, DR (n=3,617)             | 42.0 | 16.9 | 16.9 | 4.6 | 3.2 | 7.6  | 8.9  |
| Zero DR (n=5,679)                   | 47.4 | 13.4 | 20.3 | 1.7 | 3.3 | 7.5  | 6.5  |
| Other (n=43,201)                    | 47.3 | 14.7 | 19.2 | 1.6 | 3.0 | 7.7  | 6.4  |
| Cold ischemia time, hours           |      |      |      |     |     |      |      |
| ≤12 (n=20,909)                      | 44.4 | 17.4 | 18.3 | 2.2 | 3.0 | 8.2  | 6.6  |
| 13 to 24 (n=20,814)                 | 50.6 | 13.5 | 17.9 | 1.4 | 3.0 | 7.5  | 6.3  |
| 25 to 36 (n=6,259)                  | 50.5 | 11.7 | 20.5 | 1.1 | 3.0 | 6.8  | 6.4  |
| ≥37 (n=1,577)                       | 46.2 | 7.5  | 31.6 | 0.6 | 3.0 | 6.6  | 4.4  |
| Previous organ transplant           |      |      |      |     |     |      |      |
| Yes (n=9,010)                       | 60.7 | 9.3  | 11.4 | 1.2 | 3.2 | 7.8  | 6.5  |
| No (n=43,487)                       | 44.1 | 15.8 | 20.8 | 1.9 | 3.1 | 7.7  | 6.6  |
| Donor Type                          |      |      |      |     |     |      |      |
| Living donor (n=11,556)             | 36.9 | 18.5 | 22.4 | 3.3 | 3.4 | 8.1  | 7.4  |
| Deceased, KPDI <20 (n=9,285)        | 47.4 | 15.7 | 17.8 | 1.8 | 3.7 | 6.8  | 6.8  |
| Deceased, KDPI 20 to 85 (n=28,357)  | 50.9 | 13.1 | 18.2 | 1.2 | 2.7 | 7.5  | 6.3  |
| Deceased, KDPI >85 (n=3,299)        | 47.4 | 11.7 | 20.4 | 1.2 | 3.3 | 10.5 | 5.5  |
| Transplant era                      |      |      |      |     |     |      |      |
| 2005 to 2008 (n=15,133)             | 35.4 | 15.2 | 19.0 | 2.6 | 4.6 | 12.1 | 11.2 |
| 2009 to 2012 (n=20,015)             | 47.5 | 14.8 | 20.2 | 1.9 | 2.9 | 6.8  | 5.9  |
| 2013 to 2016 (n=17,349)             | 56.4 | 14.0 | 18.2 | 1.0 | 2.0 | 4.9  | 3.5  |
| Percentages are row percentages.    |      |      |      |     |     |      |      |

Chisq test for comparison of distributions of ISx regimen across all traits  $P < 0.05$  for comparison of distributions of ISx regimen across all traits, due to large sample size

“Other race” includes Asian, Native American, Pacific Islander, and multi-racial.

Abbreviations: ALEM, alemtuzumab; AZA, azathioprine; COPD, chronic obstructive pulmonary disease; CsA, cyclosporine A; ESKD, end-stage kidney disease; HLA, human leukocyte antigen; IL2, interleukin-2; KDPI, kidney donor profile index; MPA, mycophenolic acid; mTORi, mammalian target of rapamycin inhibitor; No Pred, no prednisone use post-transplant; Pred, prednisone use documented post-transplant; Tac, tacrolimus; TMG, anti-thymocyte globulin; Triple Therapy, Tac+MPA/AZA+Pred; PRA, panel reactive antibody.

**Table S2B. Distributions of early immunosuppression regimen use among kidney transplant recipients age ≥ 65 years according to other baseline patient, donor and transplant factors**

|                                          | TMG/ALEM+ Triple Therapy (Reference) (N=5,478) | IL2rAb+Triple Therapy (N=3,131) | TMG/ALEM+ Tac+MPA/AZA, No Pred (N=2,985) | IL2rAb+ Tac+MPA/AZA, No Pred (N=615) | Tac, Tac+Pred (N=420) | mTORi-based (N=1,000) | CsA-based (N=1,236) |
|------------------------------------------|------------------------------------------------|---------------------------------|------------------------------------------|--------------------------------------|-----------------------|-----------------------|---------------------|
|                                          | %                                              | %                               | %                                        | %                                    | %                     | %                     | %                   |
| <b>Sex</b>                               |                                                |                                 |                                          |                                      |                       |                       |                     |
| Male (n=9,132)                           | 34.1                                           | 22.5                            | 20.4                                     | 4.6                                  | 3.0                   | 7.2                   | 8.3                 |
| Female (n=5,733)                         | 41.3                                           | 18.7                            | 19.6                                     | 3.5                                  | 2.5                   | 6.0                   | 8.4                 |
| <b>Race</b>                              |                                                |                                 |                                          |                                      |                       |                       |                     |
| White (n=9,541)                          | 33.5                                           | 22.8                            | 20.3                                     | 4.7                                  | 3.0                   | 6.9                   | 8.8                 |
| African American (n=2,712)               | 46.9                                           | 15.8                            | 19.1                                     | 2.9                                  | 2.6                   | 7.2                   | 5.5                 |
| Hispanic (n=1,701)                       | 40.2                                           | 18.7                            | 21.4                                     | 3.0                                  | 2.5                   | 5.8                   | 8.5                 |
| Other (n=911)                            | 36.2                                           | 23.4                            | 17.8                                     | 3.8                                  | 2.5                   | 5.3                   | 11.0                |
| <b>Employment status</b>                 |                                                |                                 |                                          |                                      |                       |                       |                     |
| Working (n=1,721)                        | 35.9                                           | 22.3                            | 21.6                                     | 3.5                                  | 3.2                   | 6.9                   | 6.7                 |
| Not working (n=12,301)                   | 37.3                                           | 20.9                            | 19.8                                     | 4.3                                  | 2.7                   | 6.7                   | 8.2                 |
| <b>Body mass index, kg/m<sup>2</sup></b> |                                                |                                 |                                          |                                      |                       |                       |                     |
| <18.5 (n=194)                            | 42.3                                           | 26.3                            | 14.4                                     | 5.7                                  | 2.1                   | 3.6                   | 5.7                 |
| 18.5 to 24.9 (n=3,974)                   | 36.0                                           | 21.8                            | 19.4                                     | 4.3                                  | 3.4                   | 6.5                   | 8.6                 |
| 25.0 to 29.9 (n=5,650)                   | 36.6                                           | 21.6                            | 18.8                                     | 4.3                                  | 2.6                   | 7.4                   | 8.7                 |
| ≥30.0 (n=4,793)                          | 38.3                                           | 20.5                            | 21.0                                     | 3.8                                  | 2.5                   | 6.2                   | 7.8                 |
| <b>Comorbid conditions</b>               |                                                |                                 |                                          |                                      |                       |                       |                     |
| Hypertension (n=5,418)                   | 34.9                                           | 22.4                            | 19.9                                     | 4.4                                  | 2.6                   | 7.5                   | 8.4                 |
| Diabetes mellitus (n=6,998)              | 36.9                                           | 19.8                            | 21.4                                     | 4.0                                  | 2.9                   | 6.6                   | 8.5                 |
| Coronary artery disease (n=850)          | 31.3                                           | 21.7                            | 21.4                                     | 5.4                                  | 2.2                   | 8.1                   | 9.9                 |
| Cerebral vascular disease (n=124)        | 28.2                                           | 22.6                            | 27.4                                     | 6.5                                  | 0.0                   | 8.1                   | 7.3                 |
| Peripheral vascular disease (n=1,455)    | 34.5                                           | 21.1                            | 22.5                                     | 5.2                                  | 2.3                   | 6.5                   | 8.0                 |
| COPD (n=85)                              | 31.8                                           | 21.2                            | 27.1                                     | 4.7                                  | 1.2                   | 4.7                   | 9.4                 |
| Hepatitis C positive (n=495)             | 36.0                                           | 21.2                            | 17.2                                     | 4.4                                  | 3.0                   | 7.3                   | 10.9                |
| <b>Cause of ESKD</b>                     |                                                |                                 |                                          |                                      |                       |                       |                     |
| Hypertension (n=3,540)                   | 37.3                                           | 21.3                            | 19.0                                     | 4.3                                  | 2.5                   | 7.8                   | 7.8                 |
| Diabetes mellitus (n=5,829)              | 36.9                                           | 19.5                            | 21.9                                     | 4.1                                  | 2.8                   | 6.5                   | 8.3                 |

|                                     |      |      |      |     |     |      |      |
|-------------------------------------|------|------|------|-----|-----|------|------|
| Glomerulonephritis (n=2,854)        | 38.2 | 21.4 | 18.7 | 4.0 | 3.3 | 6.5  | 7.9  |
| Polycystic kidney disease (n=1,341) | 36.4 | 21.9 | 20.1 | 3.5 | 3.1 | 6.4  | 8.7  |
| Other (n=1,301)                     | 33.0 | 25.9 | 17.8 | 4.8 | 2.6 | 5.5  | 10.5 |
| Duration of dialysis, months        |      |      |      |     |     |      |      |
| None (pre-emptive) (n=2,316)        | 28.7 | 25.4 | 21.9 | 4.9 | 2.7 | 7.3  | 9.1  |
| >0 to 24 (n=3,790)                  | 32.6 | 24.1 | 19.6 | 5.2 | 3.3 | 7.0  | 8.2  |
| 25 to 60 (n=5,239)                  | 37.2 | 19.8 | 21.2 | 3.9 | 2.8 | 7.1  | 8.0  |
| >60 (n=3,498)                       | 46.5 | 16.9 | 17.7 | 2.9 | 2.3 | 5.6  | 8.2  |
| Most current PRA level (%)          |      |      |      |     |     |      |      |
| <10 (n=11,148)                      | 32.8 | 22.8 | 21.5 | 4.6 | 2.8 | 6.9  | 8.6  |
| 10 to 79 (n=2,220)                  | 47.4 | 17.5 | 16.0 | 2.8 | 2.5 | 5.9  | 7.9  |
| ≥80 (n=967)                         | 64.9 | 7.6  | 13.9 | 0.6 | 2.6 | 4.7  | 5.8  |
| HLA mismatches                      |      |      |      |     |     |      |      |
| Zero A, B, DR (n=972)               | 32.1 | 21.3 | 18.4 | 7.4 | 3.8 | 7.8  | 9.2  |
| Zero DR (n=1,601)                   | 37.2 | 20.7 | 21.4 | 3.8 | 2.6 | 5.3  | 9.0  |
| Other (n=12,292)                    | 37.2 | 21.1 | 20.0 | 3.9 | 2.8 | 6.8  | 8.2  |
| Cold ischemia time, hours           |      |      |      |     |     |      |      |
| ≤12 (n=6,160)                       | 34.5 | 24.3 | 19.0 | 4.5 | 3.0 | 6.9  | 7.8  |
| 13 to 24 (n=5,530)                  | 40.2 | 20.2 | 18.8 | 3.6 | 2.6 | 6.3  | 8.4  |
| 25 to 36 (n=1,852)                  | 41.1 | 17.3 | 20.8 | 2.8 | 2.7 | 7.7  | 7.7  |
| ≥37 (n=495)                         | 33.9 | 9.1  | 36.4 | 3.0 | 2.4 | 8.7  | 6.5  |
| Previous organ transplant           |      |      |      |     |     |      |      |
| Yes (n=1,121)                       | 46.6 | 15.6 | 12.2 | 2.4 | 4.6 | 7.1  | 11.5 |
| No (n=13,744)                       | 36.1 | 21.5 | 20.7 | 4.3 | 2.7 | 6.7  | 8.1  |
| Donor Type                          |      |      |      |     |     |      |      |
| Living donor (n=3,774)              | 27.6 | 26.4 | 22.1 | 5.9 | 2.7 | 6.6  | 8.8  |
| Deceased, KPDI <20 (n=1,583)        | 35.5 | 23.0 | 17.1 | 3.8 | 5.1 | 6.6  | 8.9  |
| Deceased, KDPI 20 to 85 (n=7,189)   | 41.3 | 18.7 | 19.6 | 3.4 | 2.6 | 6.3  | 8.1  |
| Deceased, KDPI >85 (n=2,319)        | 39.1 | 18.4 | 20.3 | 3.8 | 2.3 | 8.4  | 7.6  |
| Transplant era                      |      |      |      |     |     |      |      |
| 2005 to 2008 (n=3,794)              | 27.7 | 16.6 | 22.2 | 5.1 | 4.7 | 10.1 | 13.7 |
| 2009 to 2012 (n=5,864)              | 37.2 | 21.3 | 21.2 | 4.6 | 2.6 | 5.6  | 7.6  |
| 2013 to 2016 (n=5,207)              | 43.2 | 24.0 | 17.3 | 3.0 | 1.7 | 5.6  | 5.2  |
| Percentages are row percentages.    |      |      |      |     |     |      |      |

Chisq test for comparison of distributions of ISx regimen across all traits P<0.05 for comparison of distributions of ISx regimen across all traits, due to large sample size

“Other race” includes Asian, Native American, Pacific Islander, and multi-racial.

Abbreviations: ALEM, alemtuzumab; AZA, azathioprine; COPD, chronic obstructive pulmonary disease; CsA, cyclosporine A; ESKD, end-stage kidney disease; HLA, human leukocyte antigen; IL2, interleukin-2; KDPI, kidney donor profile index; MPA, mycophenolic acid; mTORi, mammalian target of rapamycin inhibitor; No Pred, no prednisone use post-transplant; Pred, prednisone use documented post-transplant; Tac, tacrolimus; TMG, anti-thymocyte globulin; Triple Therapy, Tac+MPA/AZA+Pred; PRA, panel reactive antibody.

### SUPPLEMENTAL FIGURE LEGEND

**Figure S1.** Distributions of cause graft failure (A) and death (B) according to ISx regimen and recipient age. \* P<0.05 for differences in cause within regimen.

† P<0.05 for difference in cause across age groups.



A.

## Cause of Graft Failure by ISx Regimen and Age

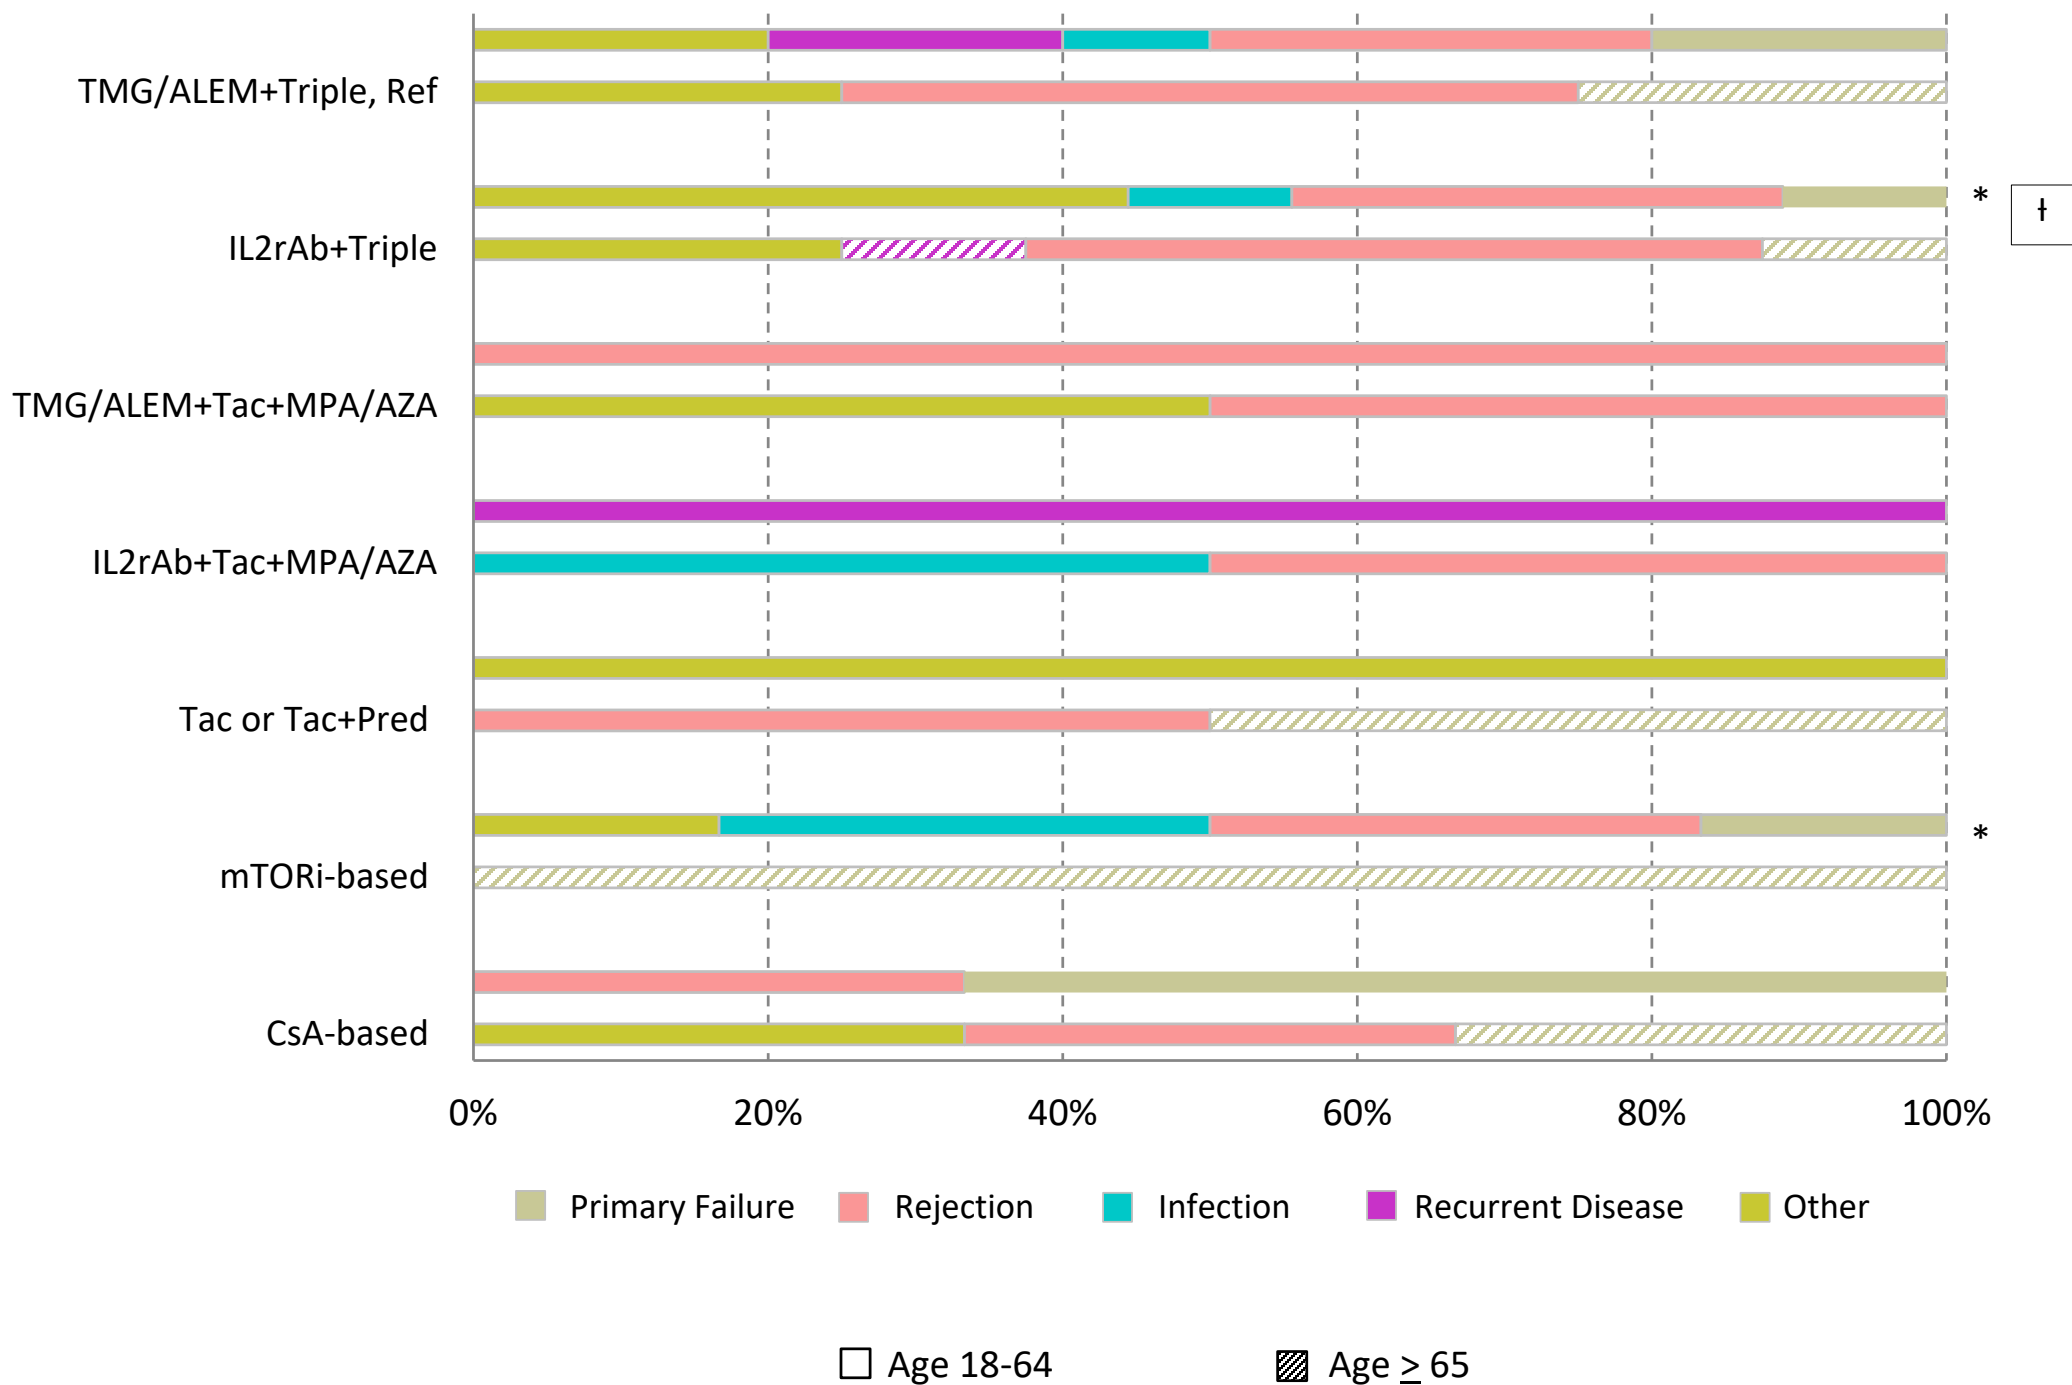

B.

# Cause of Death by ISx Regimen and Age

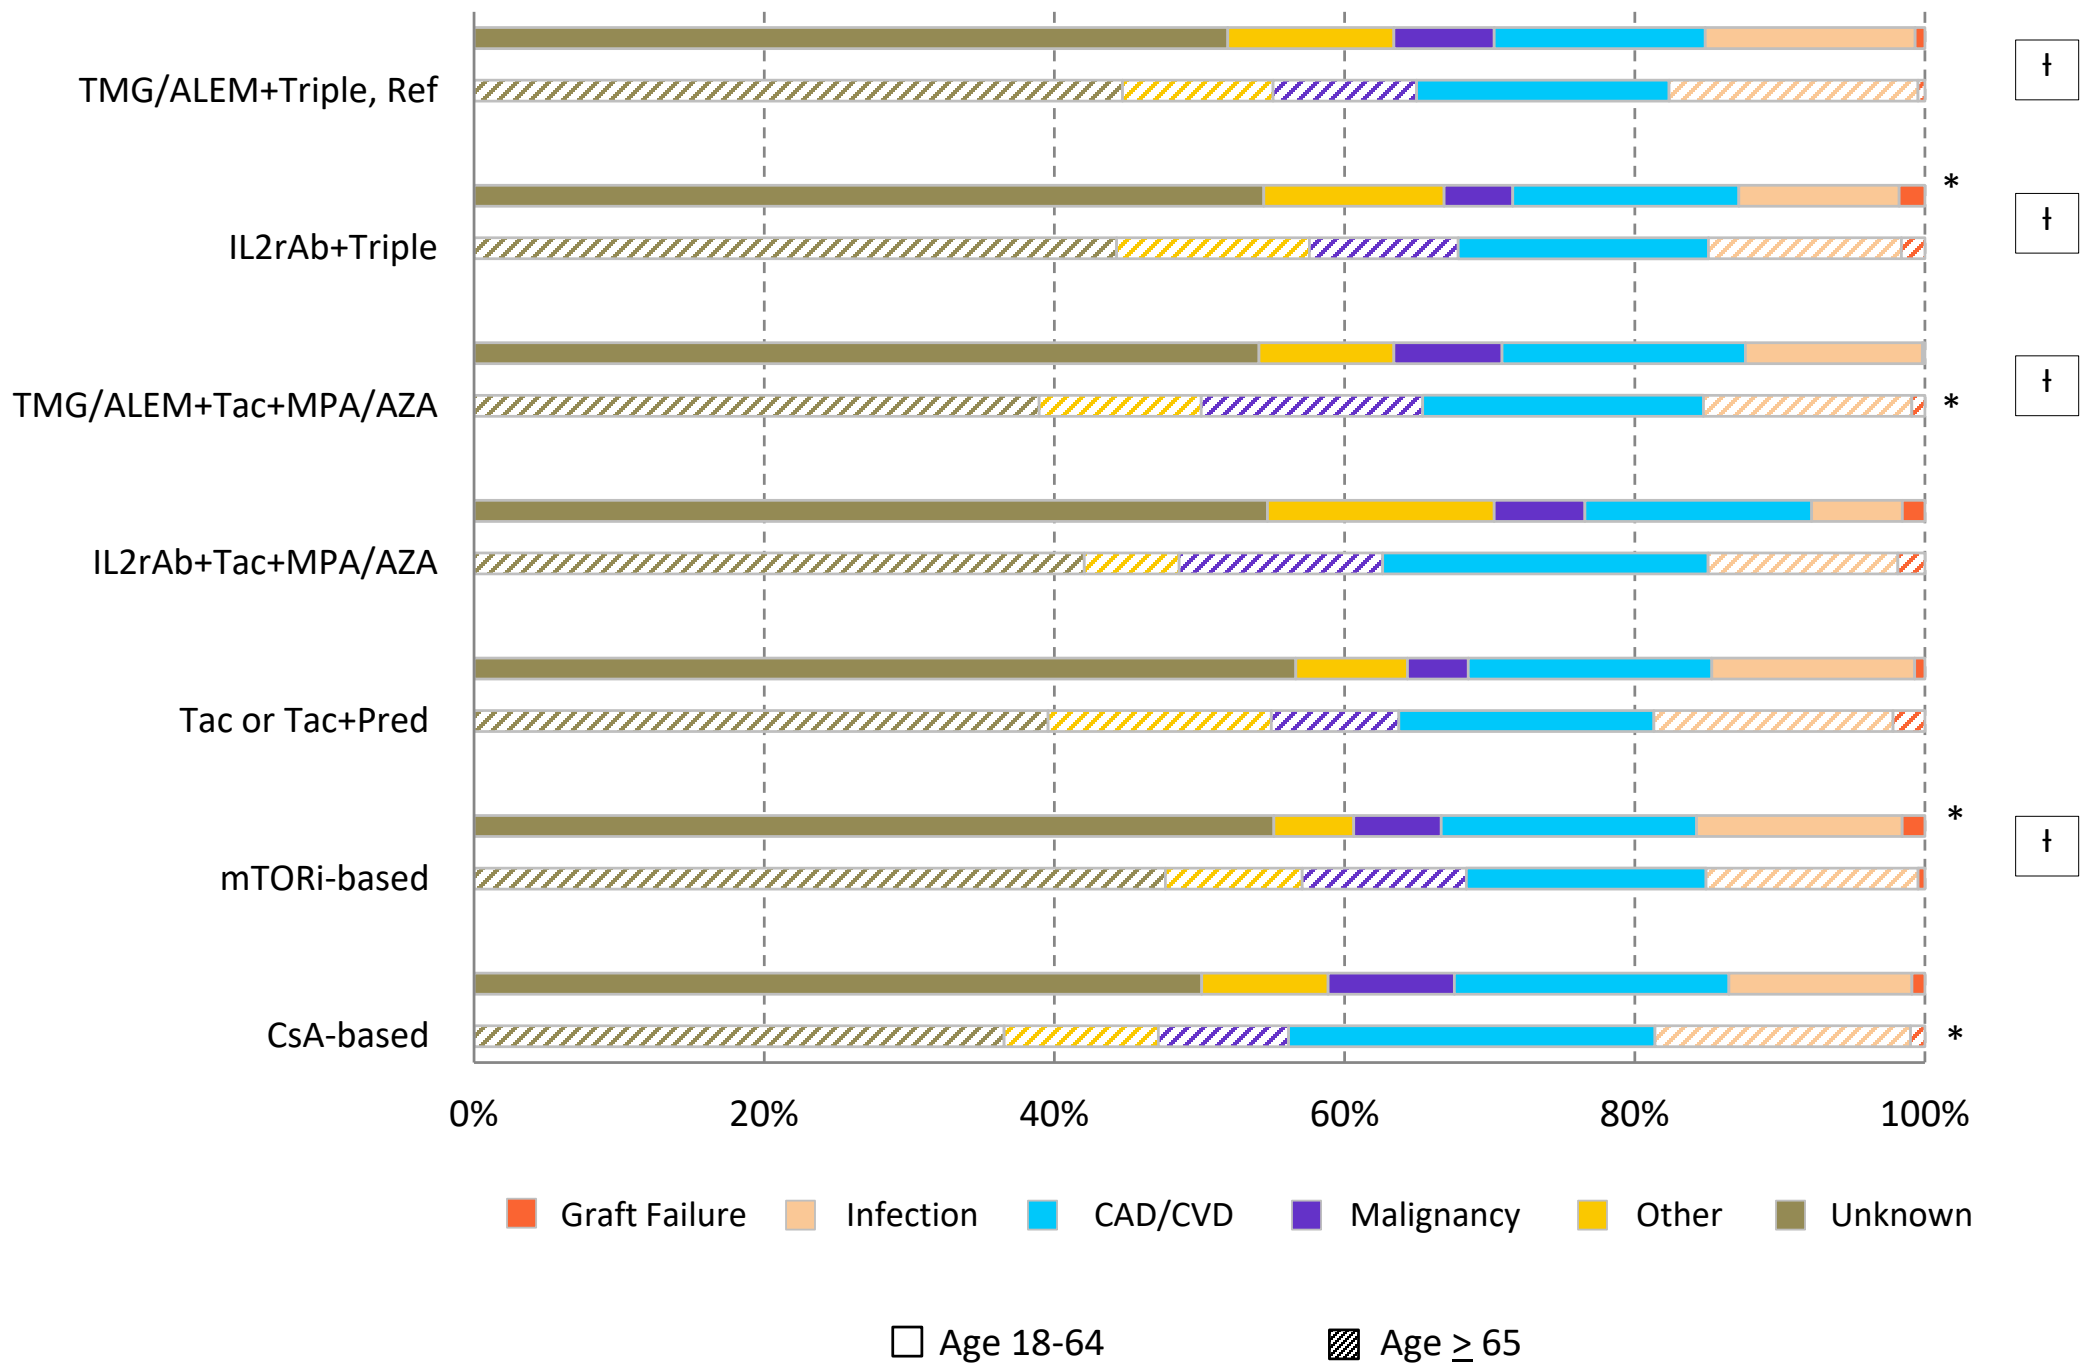

Supplement: NIHMS1646489-supplement-Supplemental_Digital_Content_to_Be_Published__cited_in_text_.pdf [file NIHMS1646489-supplement-Supplemental_Digital_Content_to_Be_Published__cited_in_text_.pdf]
